# Supplementary material for: Interventions Facilitating Family Communication of Genetic Testing Results and Cascade Screening in Hereditary Breast/Ovarian Cancer or Lynch Syndrome: A Systematic Review and Meta-Analysis
Source: MDPI journal article supplement (doi:10.3390/cancers13040925), 2021-02-23

# Supplementary Materials: Interventions Facilitating Family Communication of Genetic Testing Results and Cascade Screening in Hereditary Breast/Ovarian Cancer or Lynch Syndrome: A Systematic Review and Meta-Analysis

Table S1. Tabular representation of risk of bias in individual studies.

| Study (Author/Year)      | Sequence Generation | Allocation Concealment | Blinding of Participants and Personnel | Blinding of Outcomes Assessors | Incomplete Outcome | Selective Outcome Reporting | Other Sources of Bias |
|--------------------------|---------------------|------------------------|----------------------------------------|--------------------------------|--------------------|-----------------------------|-----------------------|
| Bodurtha 2014 [46]       | +                   | +                      | -                                      | ?                              | ?                  | ?                           | -                     |
| Dekker 2015 [50]         | +                   | +                      | -                                      | -                              | +                  | +                           | ?                     |
| Eijzenga 2018 [47]       | +                   | +                      | +                                      | +                              | +                  | -                           | -                     |
| Hodgson 2016 [48]        | +                   | +                      | -                                      | -                              | +                  | +                           | -                     |
| Katapodi 2018 [42]       | +                   | ?                      | -                                      | ?                              | +                  | +                           | ?                     |
| Loader 2002 [51]         | ?                   | ?                      | -                                      | ?                              | +                  | -                           | +                     |
| Lobb 2002 [43]           | +                   | +                      | -                                      | ?                              | ?                  | ?                           | -                     |
| Mc-Inerney-Leo 2004 [41] | ?                   | +                      | -                                      | -                              | ?                  | +                           | ?                     |
| Montgomery 2013 [44]     | +                   | ?                      | +                                      | ?                              | +                  | +                           | +                     |
| Niu 2019 [52]            | ?                   | ?                      | -                                      | ?                              | ?                  | +                           | ?                     |
| Roshanai 2009 [49]       | +                   | ?                      | +                                      | +                              | -                  | ?                           | -                     |
| Tiller 2006 [53]         | +                   | +                      | +                                      | ?                              | +                  | +                           | ?                     |
| Vogel 2019 [54]          | +                   | +                      | -                                      | -                              | +                  | +                           | ?                     |
| Wakefield 2008 [45]      | ?                   | +                      | ?                                      | ?                              | ?                  | +                           | +                     |
| +                        | Low risk of bias    | -                      | High risk of bias                      |                                | ?                  | Unclear risk of bias        |                       |

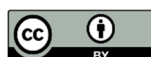

Supplement: s1 [file s1]
